# Supplementary material
Source: MDPI journal article supplement (https://www.mdpi.com/2073-445X/7/2/69)
Supplement: s1 [file s1]

## Supplements

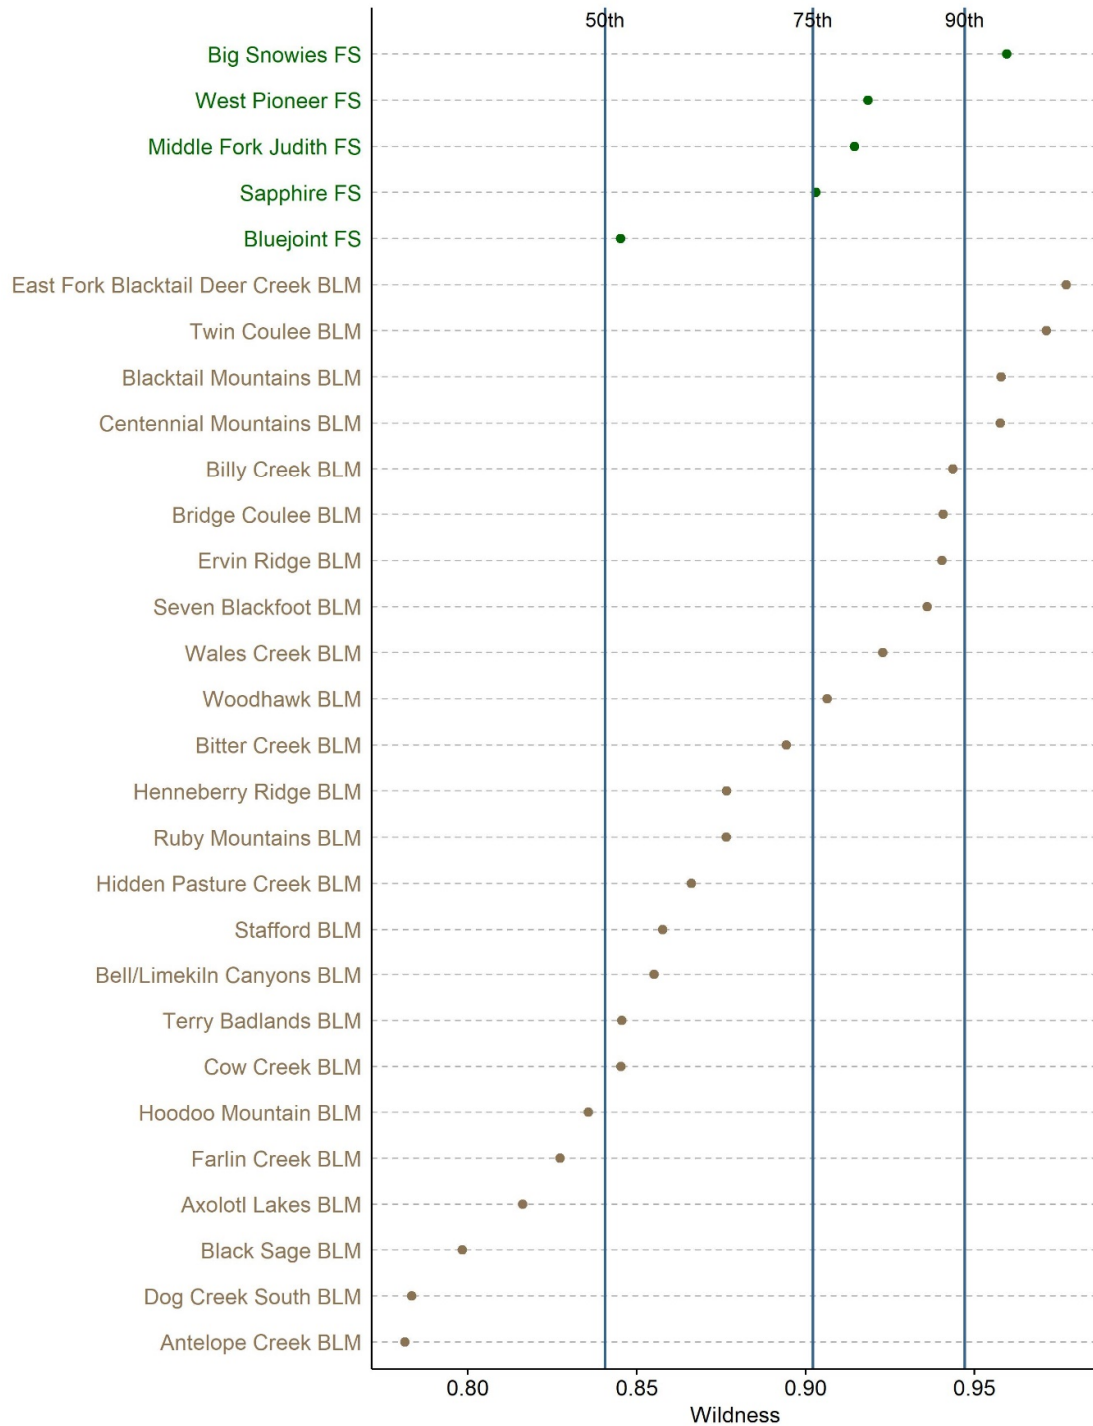

**Figure S1.** Rank order of targeted WSAs by wildness grouped by agency shown in a dot chart. Higher values represent less human modified landscapes and higher wildness values. Vertical lines represent the 50th, 75th, and 90th percentile of wildness for national parks and wilderness areas combined to allow for easy comparison of individual WSAs with central tendency of highly protected areas (national parks and wilderness areas).

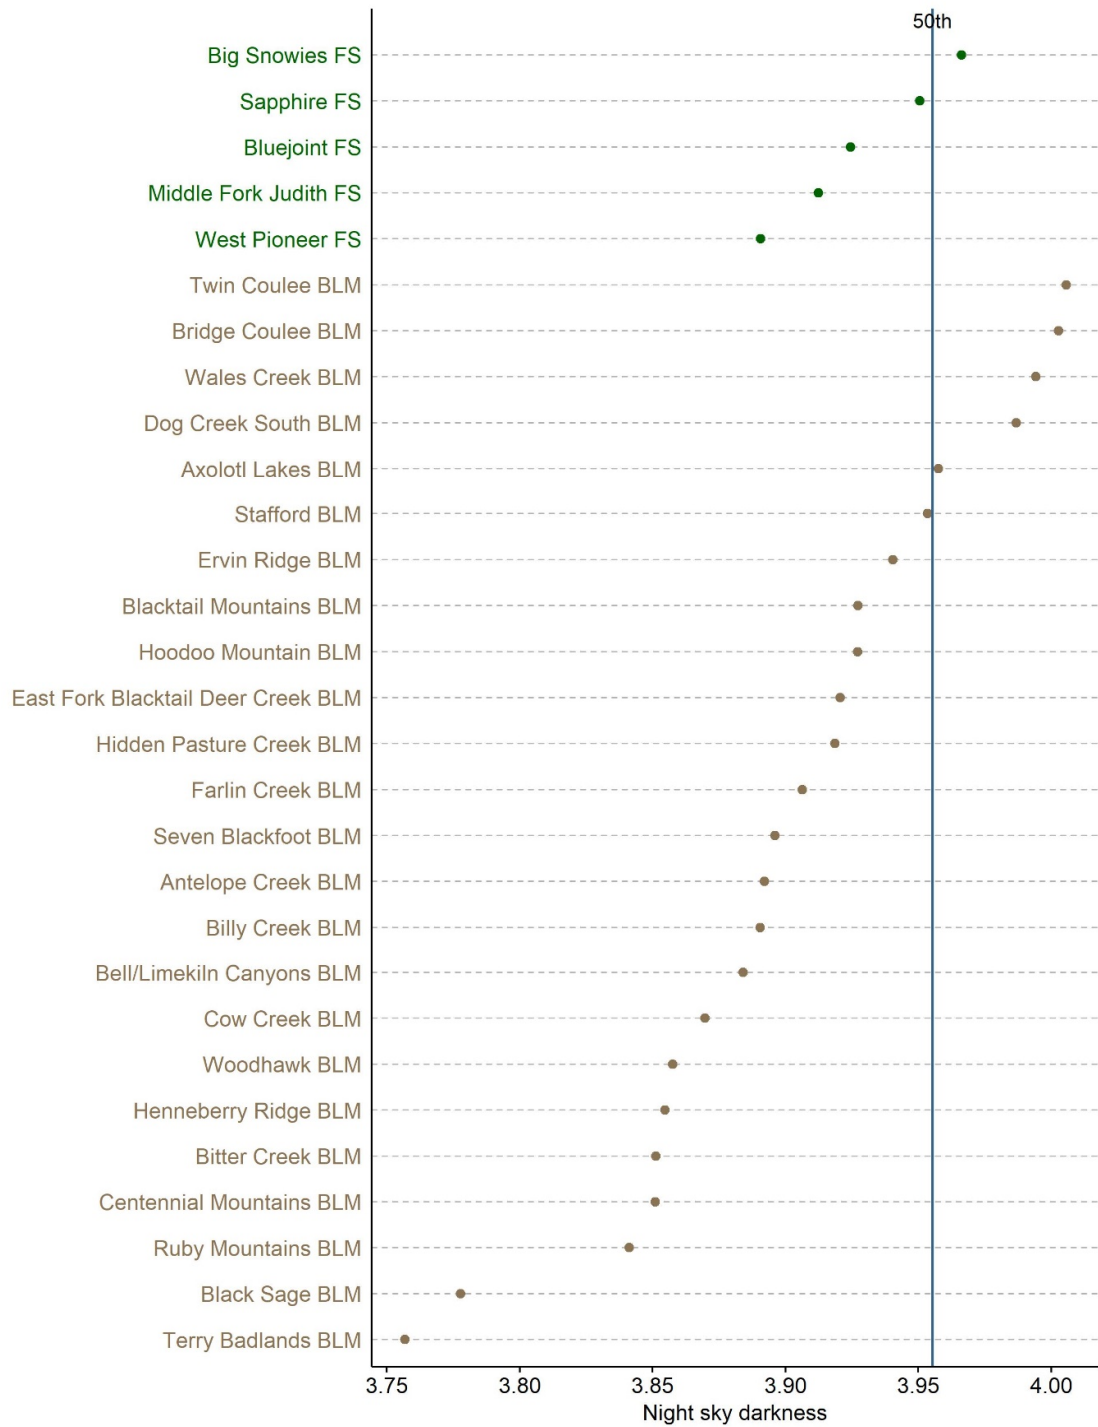

**Figure S2.** Rank order of targeted WSAs by the night sky darkness (opposite of light pollution) grouped by agency shown in a dot chart. High values represent darker night skies. Vertical lines represent the 50th percentile of light pollution for national parks and wilderness areas combined to allow for easy comparison of individual WSAs with central tendency of highly protected areas (national parks and wilderness areas).

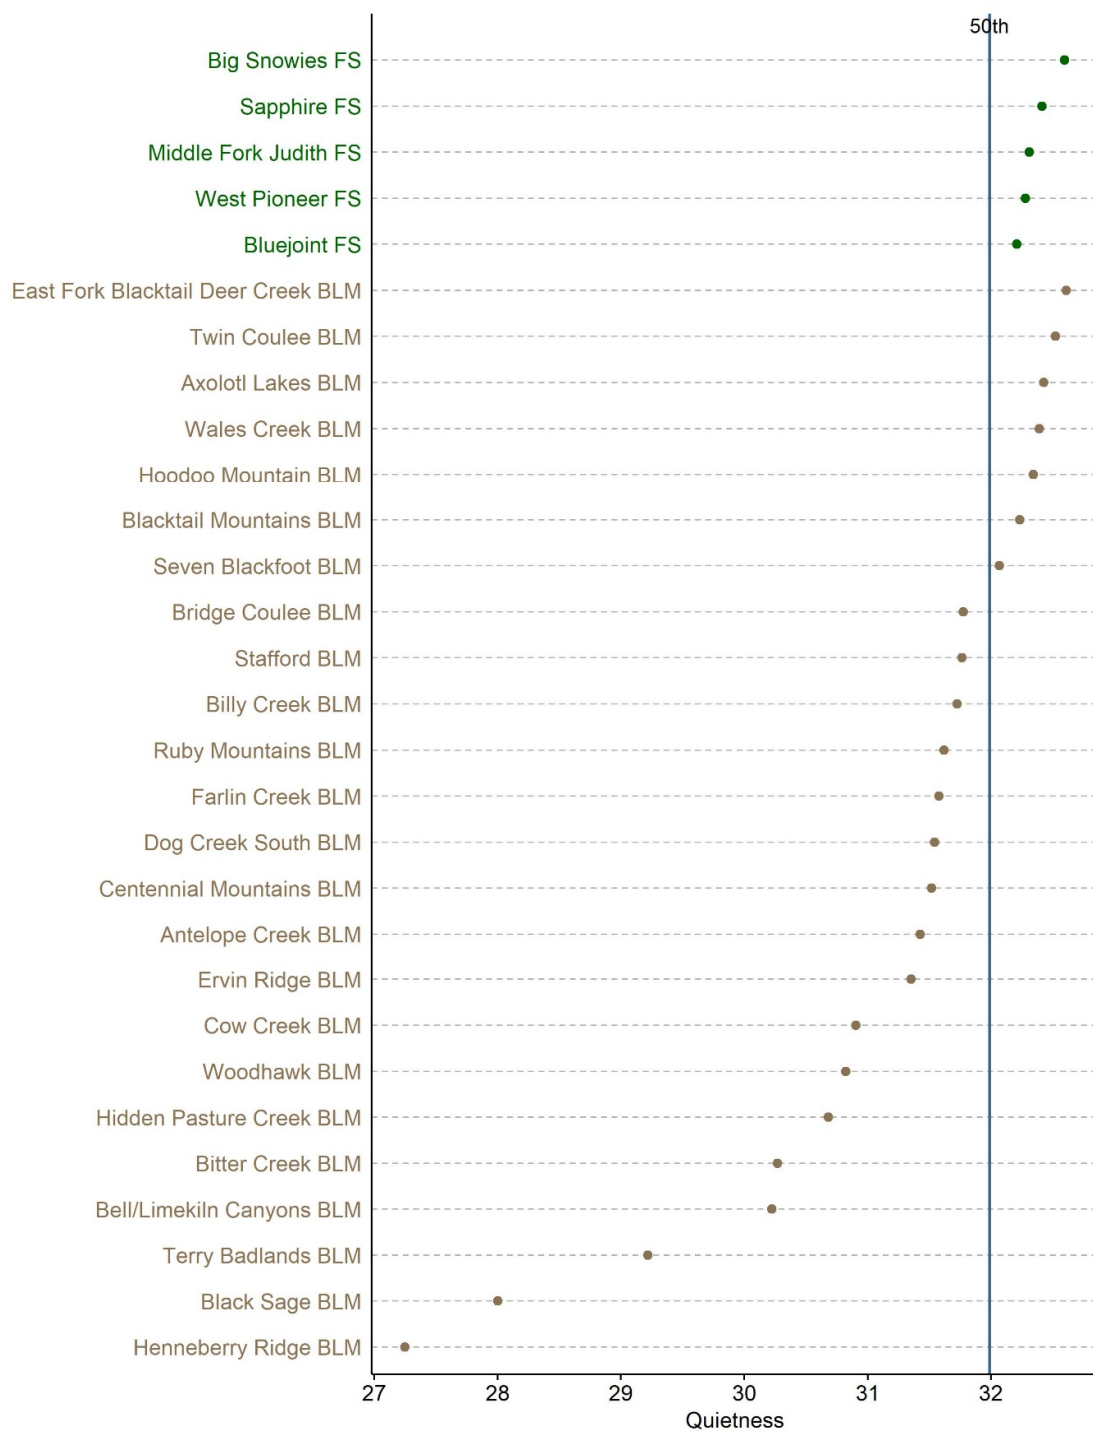

**Figure S3.** Rank order of targeted WSAs by quietness (opposite of noise pollution) grouped by agency shown in a dot chart. Higher values represent quieter landscapes. Vertical lines represent the 50th percentile of noise pollution for national parks and wilderness areas combined to allow for easy comparison of individual WSAs with central tendency of highly protected areas (national parks and wilderness areas).

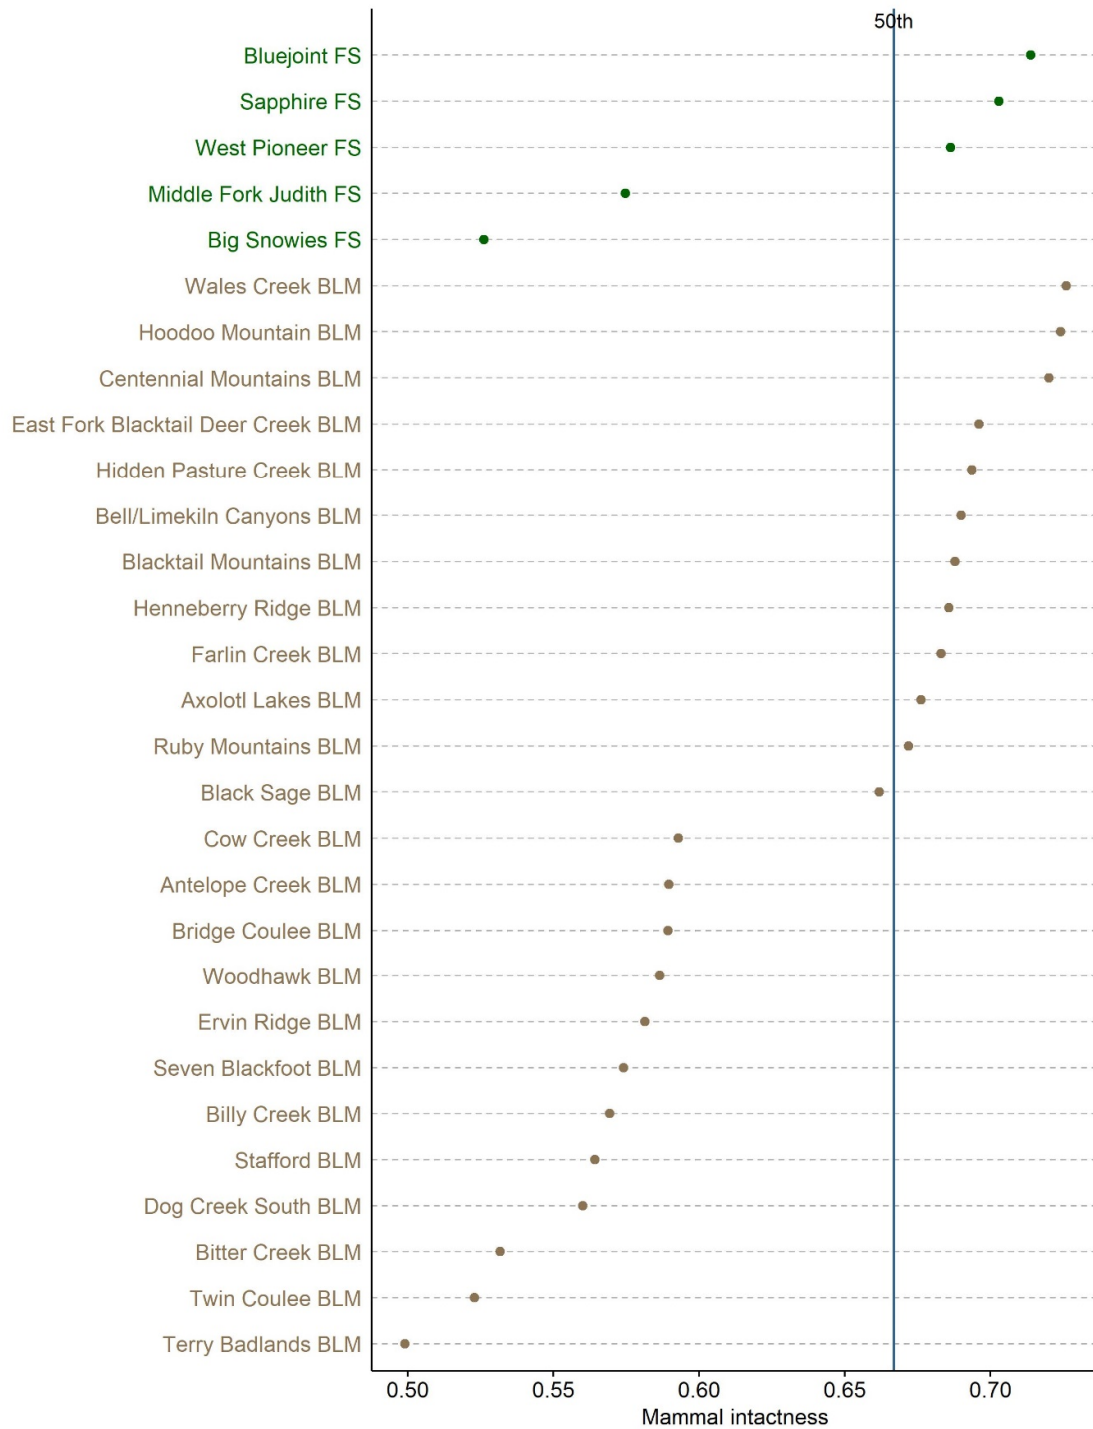

**Figure S4.** Rank order of targeted WSAs by mammal intactness grouped by agency shown in a dot chart. Higher values represent a more intact mammal assemblage. Vertical lines represent the 50th percentile of mammal intactness for national parks and wilderness areas combined to allow for easy comparison of individual WSAs with central tendency of highly protected areas (national parks and wilderness areas).

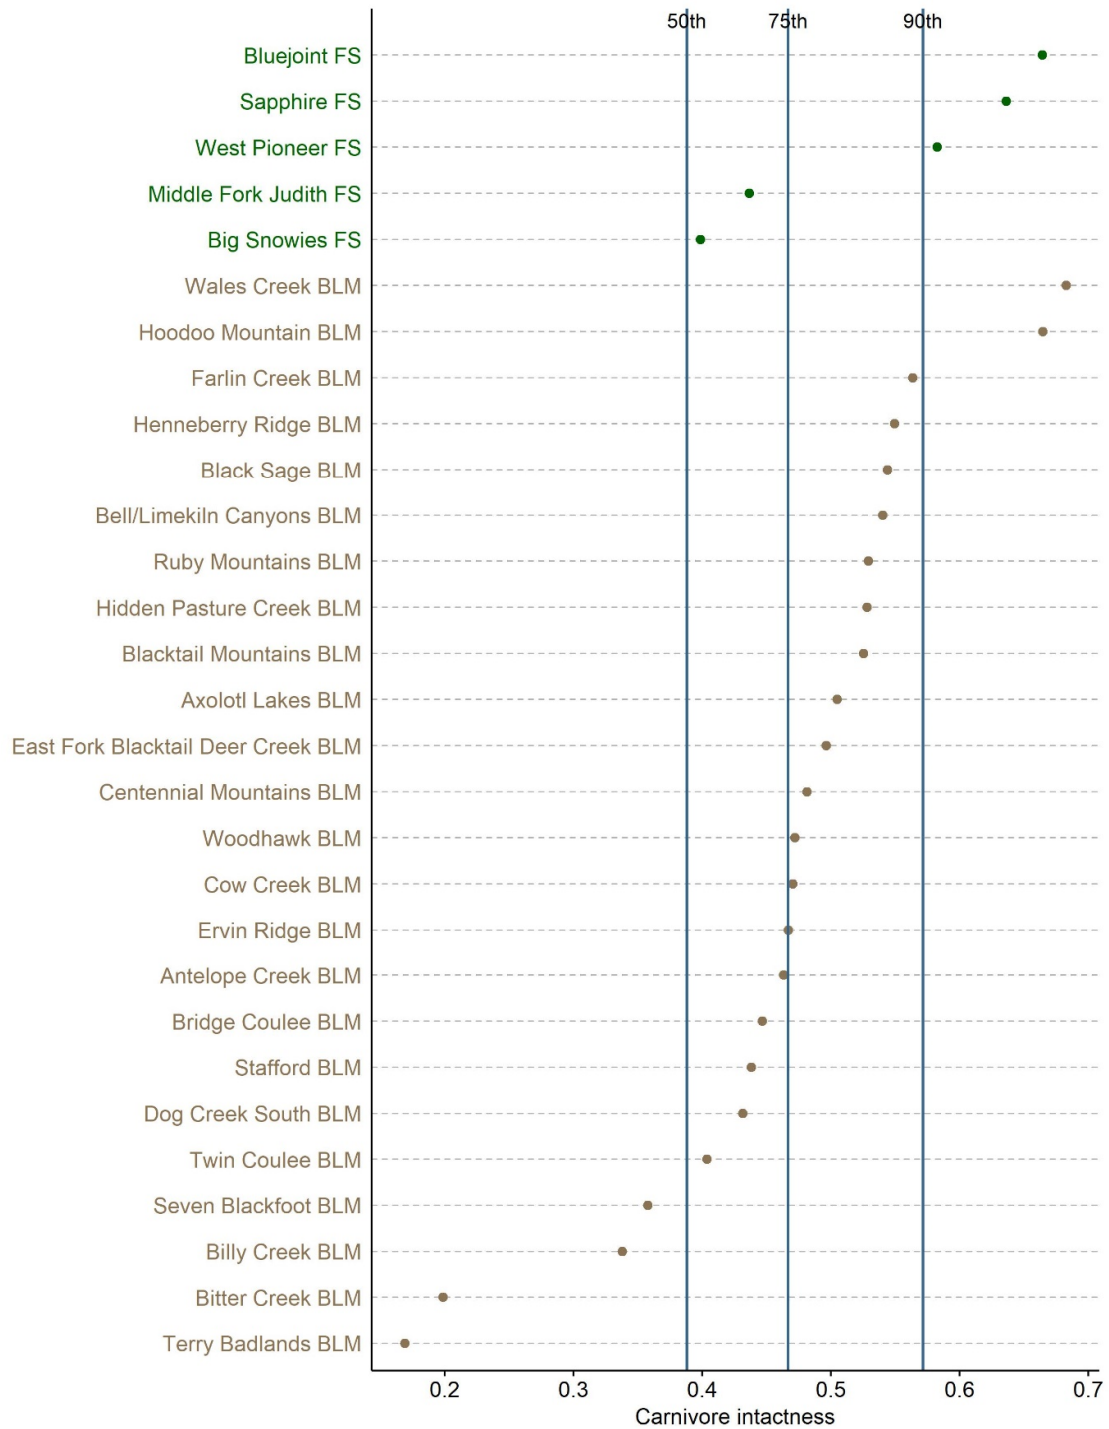

**Figure S5.** Rank order of targeted WSAs by mammal carnivore intactness grouped by agency shown in a dot chart. Higher values represent a more intact carnivore assemblage. Vertical lines represent the 50th percentile of carnivore intactness for national parks and wilderness areas combined to allow for easy comparison of individual WSAs with central tendency of highly protected areas (national parks and wilderness areas).
